# Supplementary material for: Structural insights into flagellar stator–rotor interactions
Source: eLife journal article supplement (doi:10.7554/elife.48979), 2019-07-17
Supplement: supp [file elife-48979-supp-v1.zip]

Archive with 13 entries (13 files):
- elife_poa_e48979_Supplementary_file_2.docx
- elife_poa_e48979_Supplementary_file_1.docx
- elife_poa_e48979_Figure_4_figure_supplement_4.pdf
- elife_poa_e48979_Figure_4_figure_supplement_1.pdf
- elife_poa_e48979_Figure_3_figure_supplement_1.pdf
- elife_poa_e48979_Figure_1_figure_supplement_2.pdf
- elife_poa_e48979_Figure_4_figure_supplement_2.pdf
- elife_poa_e48979_Figure_4_figure_supplement_3.pdf
- elife_poa_e48979_Figure_2_figure_supplement_1.pdf
- elife_poa_e48979_Video_2.mov
- elife_poa_e48979_Figure_1_figure_supplement_1.pdf
- elife_poa_e48979_Video_1.mov
- elife_poa_e48979_Transparent_Reporting_File.pdf
