# Supplementary material for: Structural insights into flagellar stator–rotor interactions
Source: eLife journal article supplement (doi:10.7554/elife.48979), 2019-07-17
Supplement: supp [file elife-48979-supp-v1.zip › elife_poa_e48979_Figure_1_figure_supplement_2.pdf]

|    |                                                              |     |
|----|--------------------------------------------------------------|-----|
| B. | -----MALRIKKPSKCDEGSPDYMLTYGDMVTLLLVFFVTMFSLNDIIFQENVIRI     | 51  |
| E. | MKNQAHPIIVVKRRKAKSH-GAAHGSWKIAYADFMTAMMAFFLVMWLISISSP-KELIQI | 58  |
| S. | MKNQAHPIVVVKRRRHKPHGGGAHGSWKIAYADFMTAMMAFFLVMWLISISSP-KELIQI | 59  |
| B. | MSASF-TGAGFFKGGKTLDFSKLSYLSNSFMSLPSTVRNKQASQ--TAKNKSMIEFIEKI | 108 |
| E. | AEYFRTPLATAVTGGDRIS-----NSESPIPGGGDDYTQSQGEVNKQPNIEELKKRM    | 110 |
| S. | AEYFRTPLATAVTGGNRIA-----NSESPIPGGGDDYTQQQGEVEKQPNIDELKKRM    | 111 |
| B. | QS-----K-----NIVVRQEERGI---VISLAADAFFDSASADVKL               | 141 |
| E. | EQSRLRKLRGDLDQLIESDPKLRALRPHLKIDLVQEGLRIQIIDSQNRPMFRTGSADVEP | 170 |
| S. | EQSRLNKLRGDLDQLIESDPKLRALRPHLKIDLVQEGLRIQIIDSQNRPMFKTGSAEVEP | 171 |
| B. | EENRDSIQKIASFIGFLSPRGYNFKIEGHTDNIDTDVNGPWKSNWELSAARSVNMLEHI- | 200 |
| E. | Y-MRDILRAIAP---VLNGIPNRISLSGHTDDFPYASGEKGYSNWELSADRANASRRELM | 226 |
| S. | Y-MRDILRAIAP---VLNGIPNRISLAGHTDDFPYANGEKGYSNWELSADRANASRRELV | 227 |
| B. | LNYLDQSDVKRIENNFEVSGFGGSRPIATDDTPEGRAYNRRIDILITTDASLS-FPKEIK | 259 |
| E. | VGGLDSGKVLRV-----VGMA--ATMRLSDRGPDDAVNRRISLLVLNKQAEQAILHENA  | 278 |
| S. | AGGLDNGKVLRV-----VGMA--ATMRLSDRGPDDAINRRISLLVLNKQAEQAILHENA  | 279 |
| B. | Q-----                                                       | 260 |
| E. | ESQNEPVSALEKPEVAPQVSVPTMPSAEPR                               | 308 |
| S. | ESQNEPVSVLQQPAAAPPASVPTSPKAEPR                               | 309 |
