# Supplementary figures and images for: Structural insights into flagellar stator–rotor interactions
Source: eLife journal article supplement (doi:10.7554/elife.48979), 2019-07-17

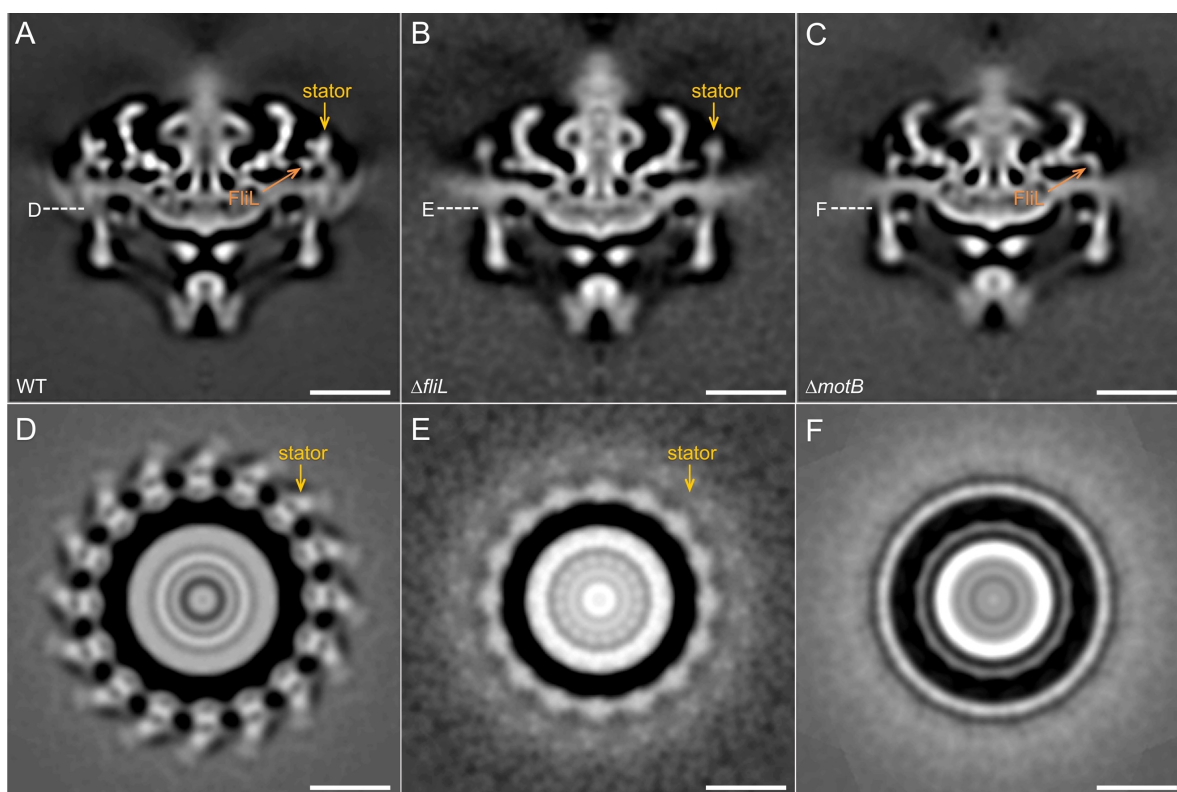

Supplement: supp [file elife-48979-supp-v1.zip › elife_poa_e48979_Figure_4_figure_supplement_4.pdf]

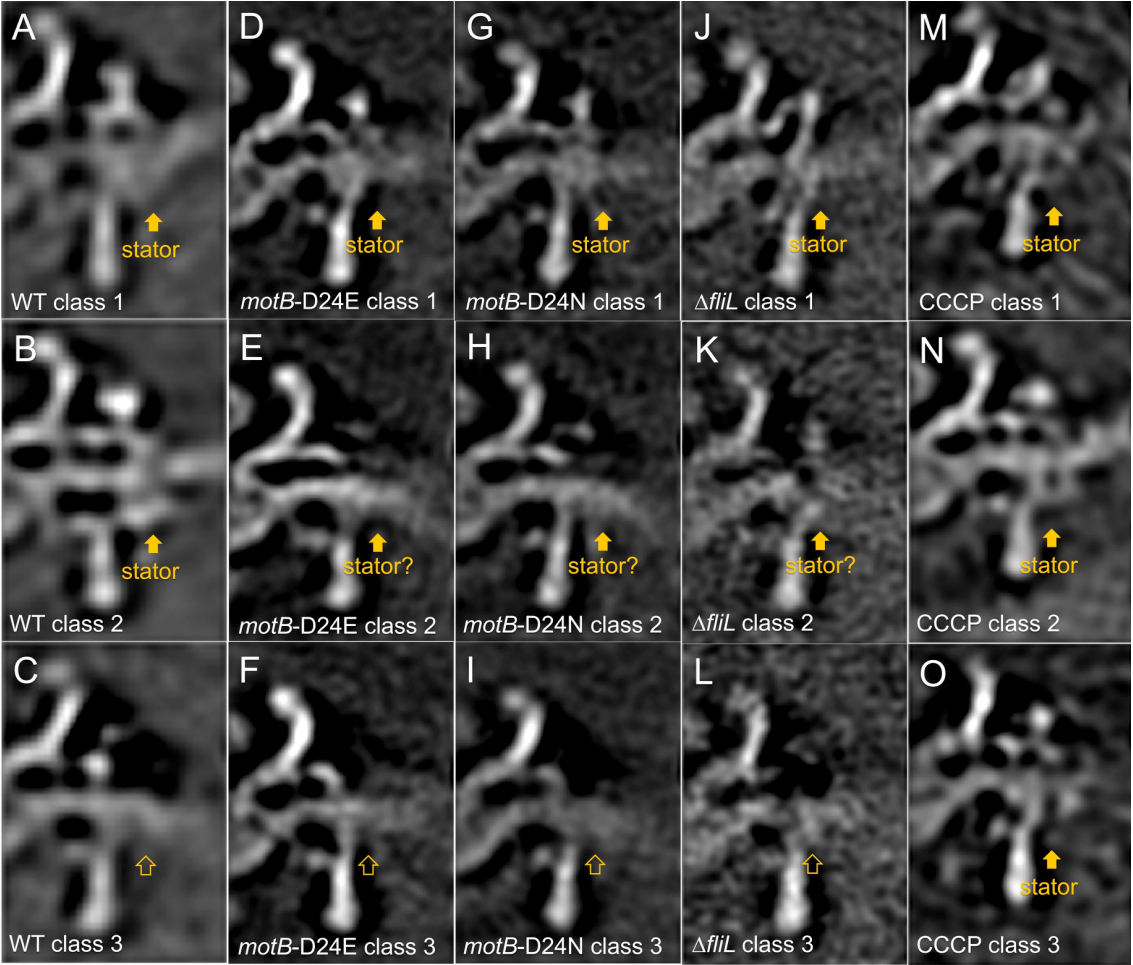

Supplement: supp [file elife-48979-supp-v1.zip › elife_poa_e48979_Figure_4_figure_supplement_1.pdf]

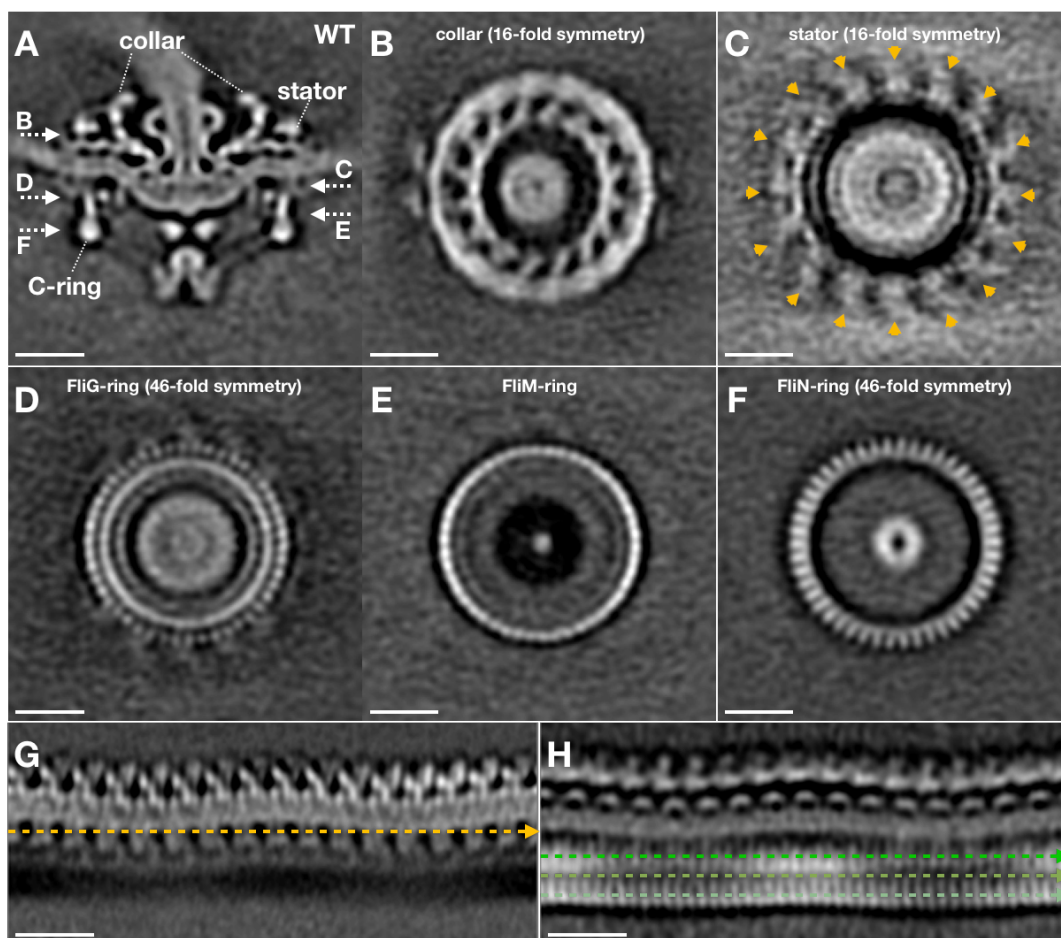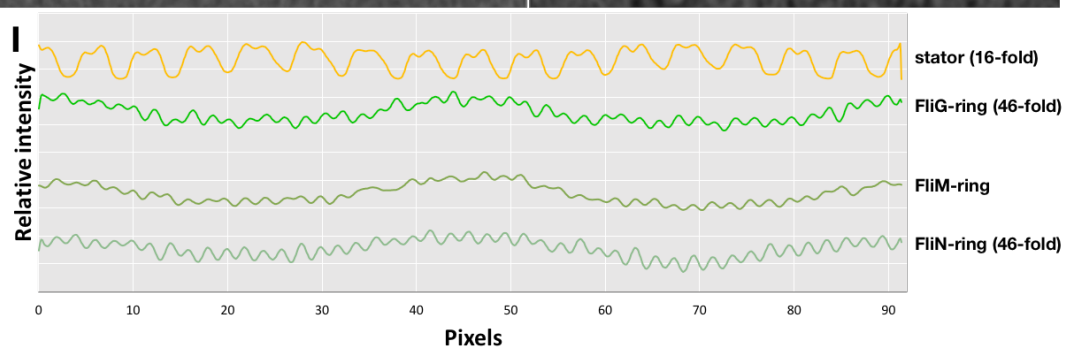

Supplement: supp [file elife-48979-supp-v1.zip › elife_poa_e48979_Figure_3_figure_supplement_1.pdf]

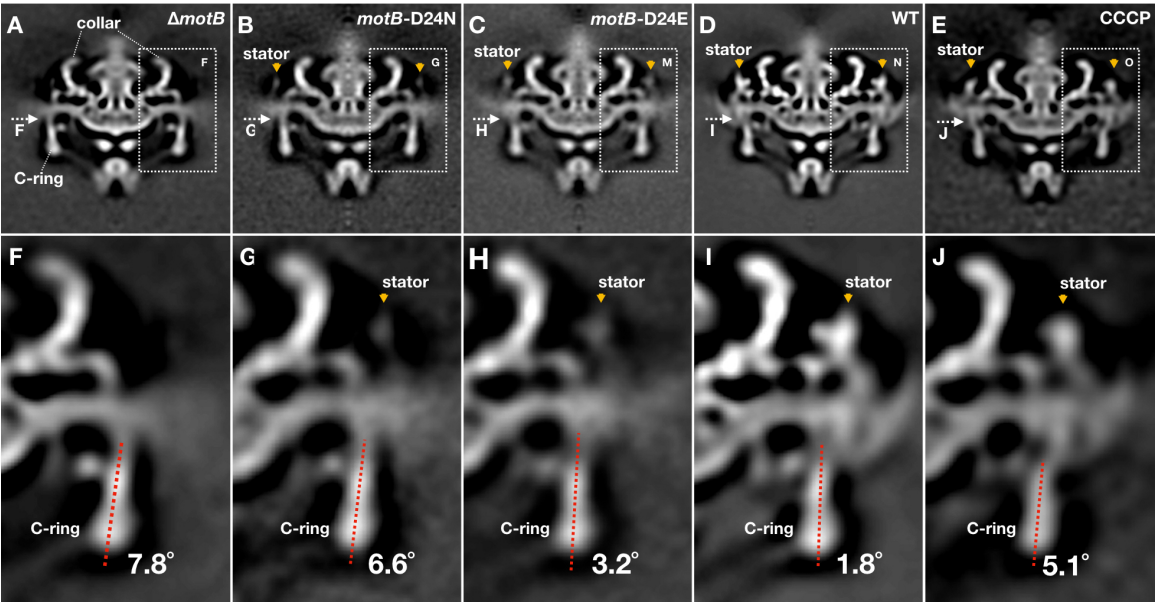

Supplement: supp [file elife-48979-supp-v1.zip › elife_poa_e48979_Figure_4_figure_supplement_2.pdf]

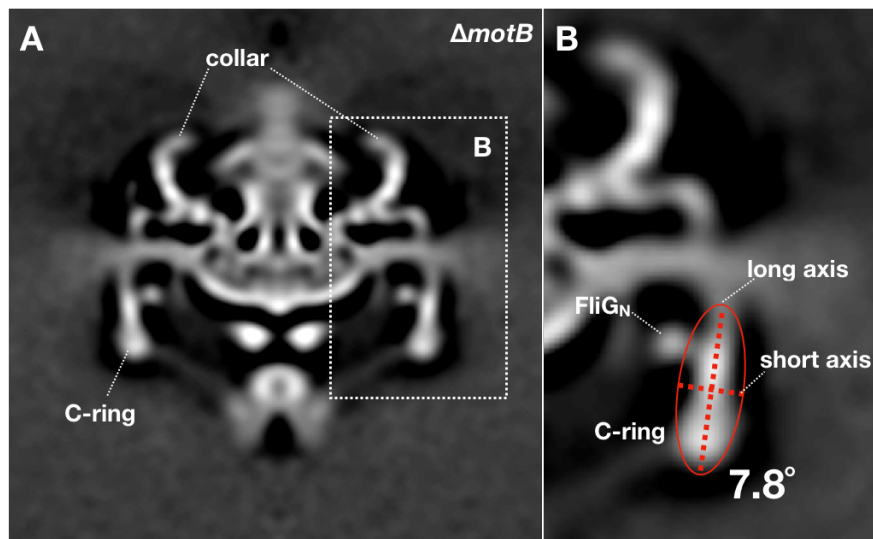

Supplement: supp [file elife-48979-supp-v1.zip › elife_poa_e48979_Figure_4_figure_supplement_3.pdf]

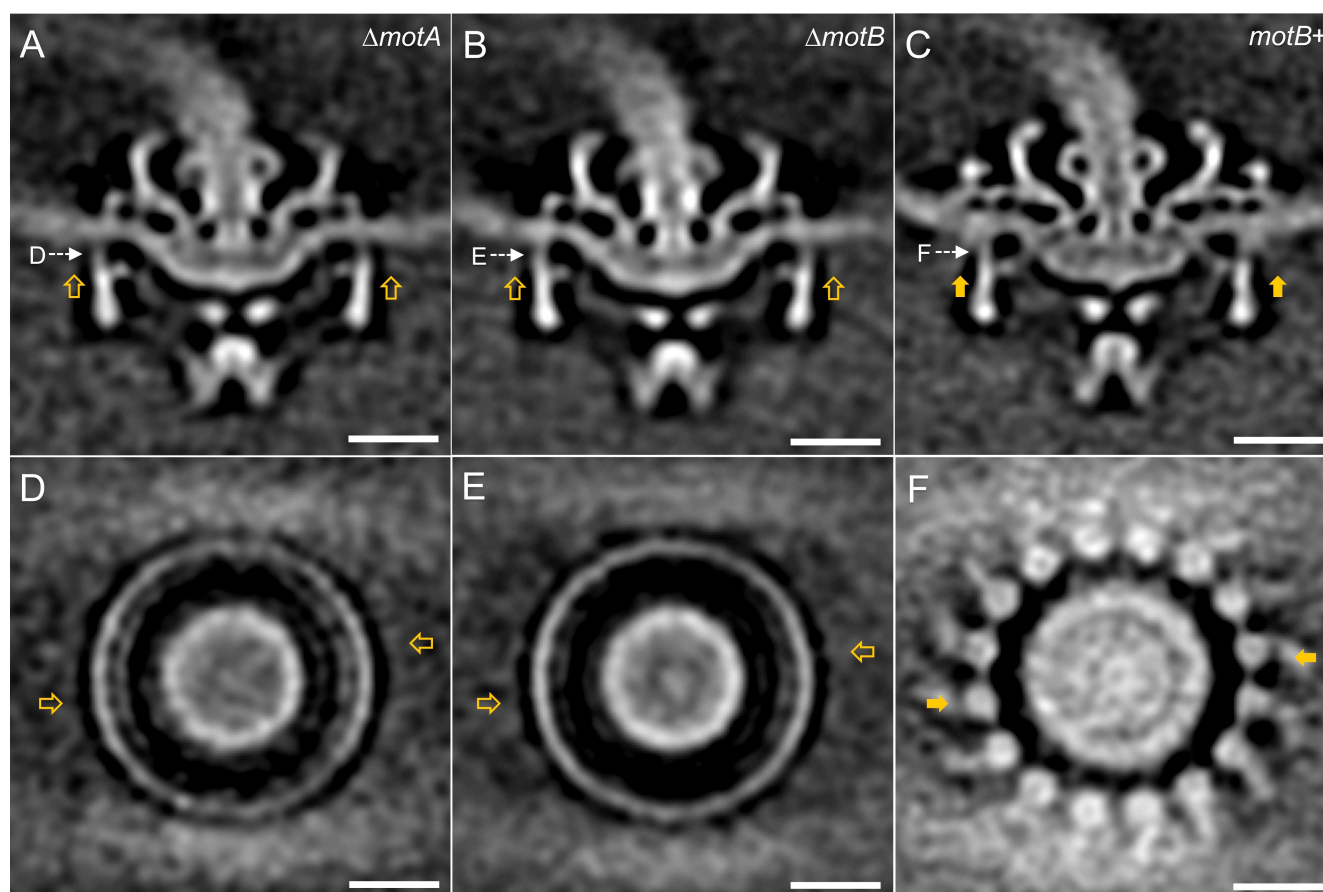

Supplement: supp [file elife-48979-supp-v1.zip › elife_poa_e48979_Figure_2_figure_supplement_1.pdf]

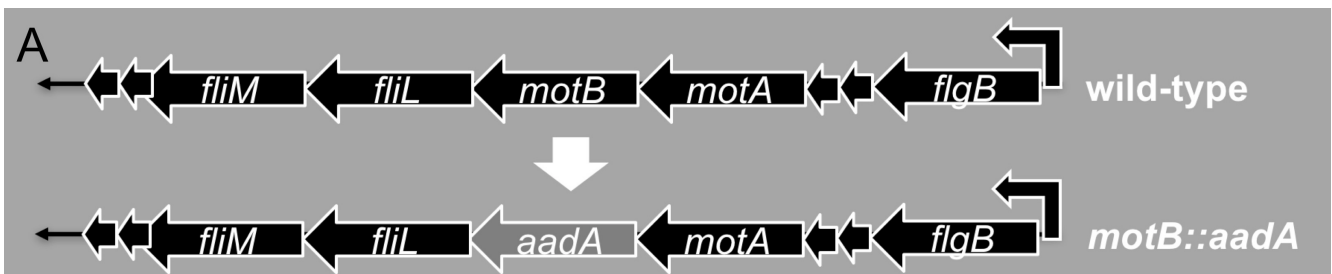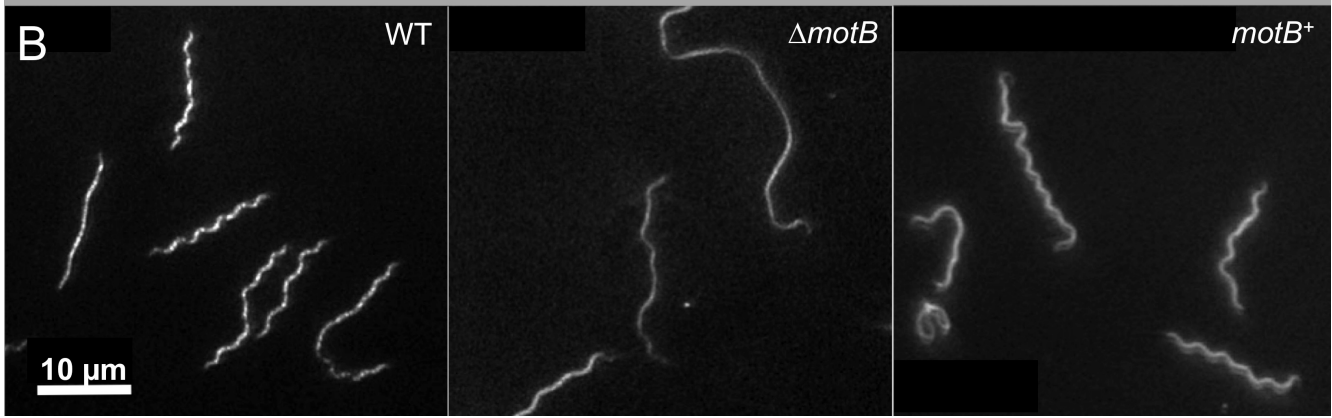

Supplement: supp [file elife-48979-supp-v1.zip › elife_poa_e48979_Figure_1_figure_supplement_1.pdf]
